# Supplementary material for: Understanding and Mitigating the Dissolution and Delamination Issues Encountered with High-Voltage LiNi0.5Mn1.5O4
Source: MDPI journal article supplement (doi:10.3390/batteries9090435), 2023-08-24
Supplement: s1 [file s1]

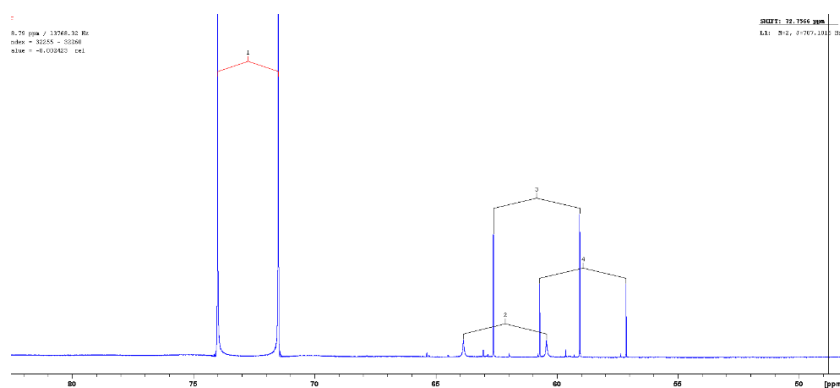

1, doublet, -83.32 ppm, J =967.6 Hz,  $\text{OPF}_2(\text{OH})$

2, doublet, -84.61 ppm, J= 1004,4 Hz,  $\text{OPF}_2(\text{OCH}_2\text{CH}_2\text{OMe})$

3, doublet, -86.53 ppm, J=1006.5 Hz,  $\text{OPF}_2(\text{OMe})$

**Figure S1.**  $^{19}\text{F}$  NMR and the multiplet assignment of each compound in the aged Gen2 in a glass vial

|                | Normalized Peak Width of $-\text{CH}_3$ from $^1\text{H}$ NMR | Normalized Peak Width of $\text{PF}_6^-$ from $^{19}\text{F}$ NMR |
|----------------|---------------------------------------------------------------|-------------------------------------------------------------------|
| NMC532 (Glass) | 0.004257208                                                   | 0.006699033                                                       |
| LNMO (PE)      | 0.010027486                                                   | 0.069683416                                                       |
| LNMO (Glass)   | 0.044072647                                                   | 0.092793752                                                       |
| LNMO-1 (Glass) | 0.063905945                                                   | 0.13204971                                                        |
| LNMO-2 (Glass) | 0.037376935                                                   | 0.073357902                                                       |

**Figure S2.** Full width at half maximum measurements from  $^1\text{H}$  NMR and  $^{19}\text{F}$  NMR spectra of the laminates soaking test. Normalized Width =  $\sum (\text{Peak Width} / \text{Peak Area}^{0.5})$ .

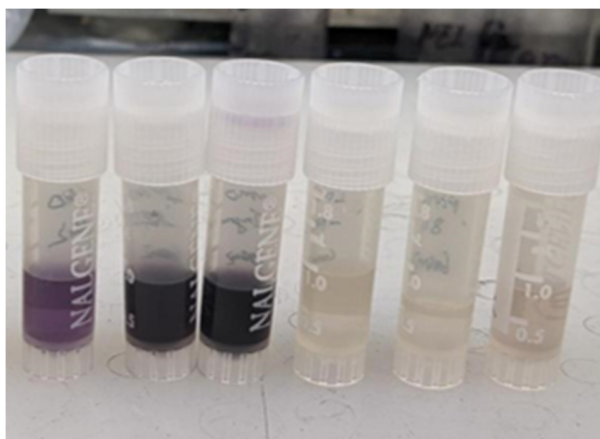

**Figure S3.** Gen2 electrolytes collected after electrode powder soaking test (samples from left to right are LMO, LNMO from NEI Corporation, LNMO from Targray, LMR-NMC, NMC811 and NMC442, respectively).

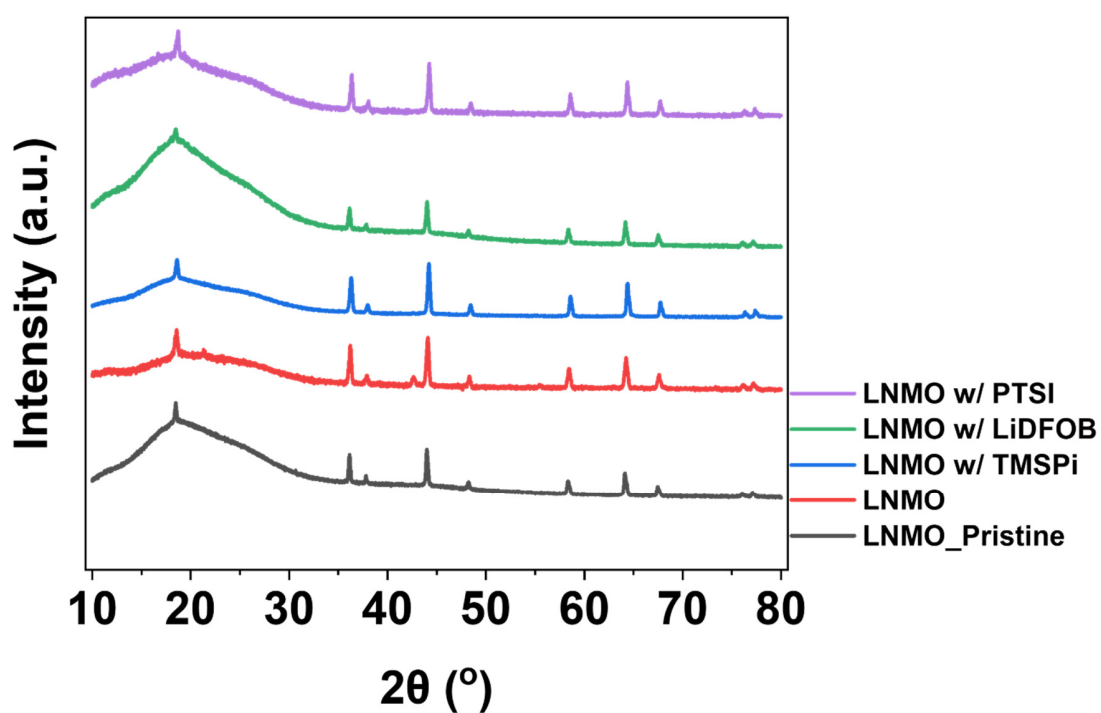

**Figure S4.** XRD patterns of the pristine LNMO (black) and the LNMOs collected after soaking in glass with Gen2 (red), Gne2 with TMSPi (blue), Gen2 with LiDFOB (green), and Gen2 with PTSI (purple).
