# Supplementary material for: Understanding and Mitigating the Dissolution and Delamination Issues Encountered with High-Voltage LiNi0.5Mn1.5O4
Source: MDPI journal article supplement (doi:10.3390/batteries9090435), 2023-08-24
Supplement: s1 [file s1]

Archive with 1 entries (1 files):
- batteries-2533403-supplementary.pdf
